# Supplementary material for: Mesoporous silica supported bimetallic Pd/Fe for enhanced dechlorination of tetrachloroethylene
Source: Royal Society of Chemistry journal article supplement (doi:10.1039/c5ra15070a), 2015-01-01
Supplement: c5ra15070a1.pdf [file c5ra15070a1.pdf]

## **Electronic Supplementary Information**

### **Mesoporous silica supported bimetallic Pd/Fe for enhanced dechlorination of tetrachloroethylene**

**Ruey-an Doong<sup>a, b\*</sup>, Sandip Saha<sup>a</sup>, Cheng-Hsen Lee<sup>b</sup> and Hong-ping Lee<sup>c</sup>**

<sup>a</sup> Institute of Environmental Engineering, National Chiao Tung University, Hsinchu, 30010, Taiwan. E-mail: [radoong@nctu.edu.tw](mailto:radoong@nctu.edu.tw)

<sup>b</sup> Department of Biomedical Engineering and Environmental Sciences, National Tsing Hua University, Hsinchu, 30013, Taiwan.

<sup>c</sup> Department of Chemistry, National Cheng Kung University, Tainan, 700, Taiwan.

**9 pages and 8 figures.**

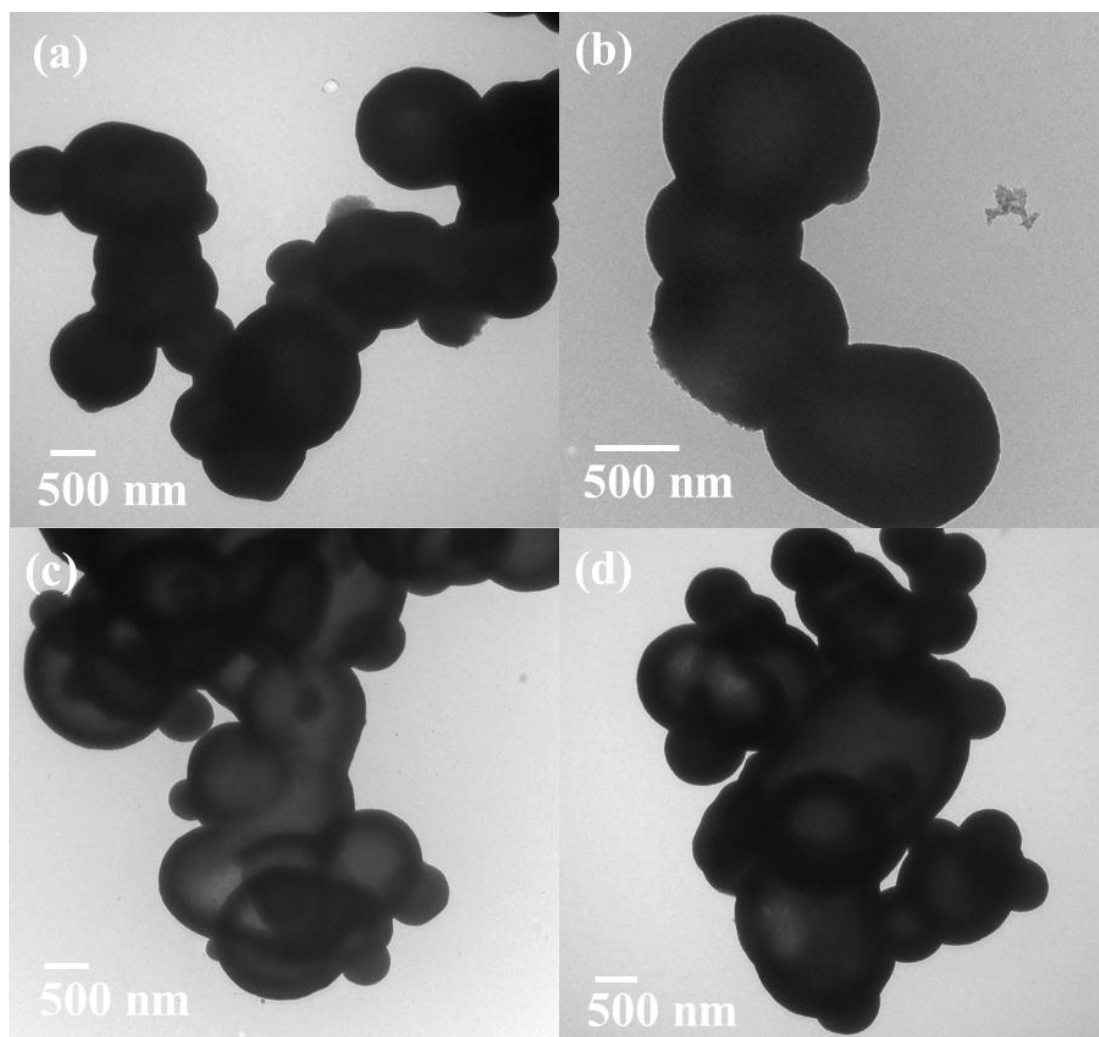

**Fig. S1.** TEM images of mesoporous silica microspheres fabricated at various hydrothermal durations. (a) 1, (b) 3, (c) 5 and (d) 7 days.

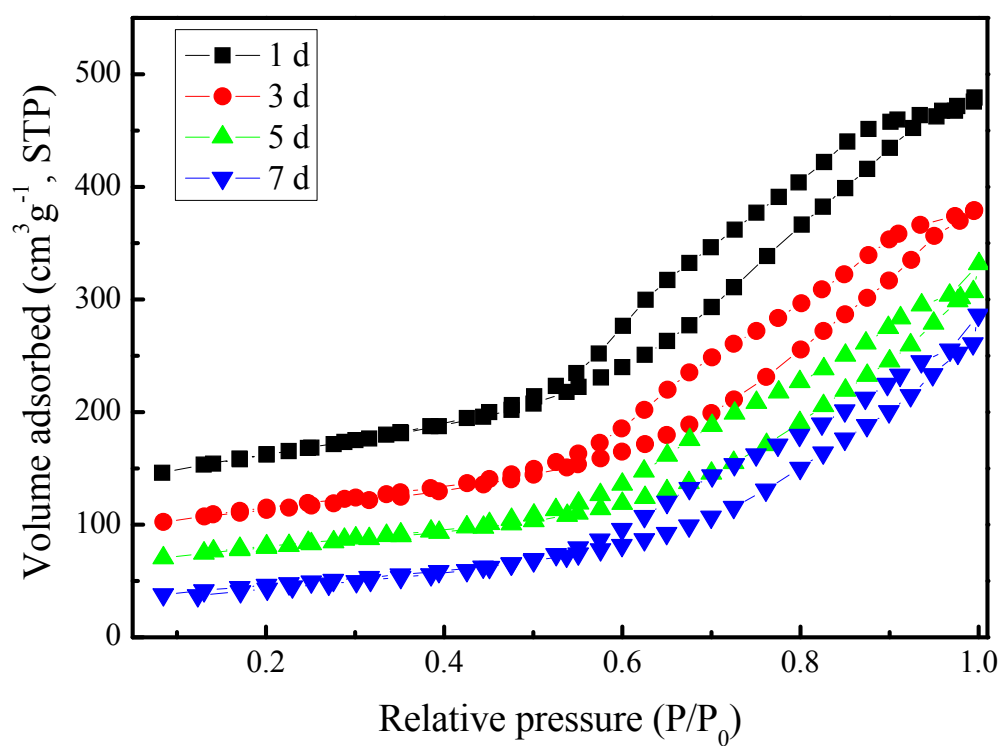

**Fig. S2.** The N<sub>2</sub> adsorption-desorption isotherms of mesoporous SiO<sub>2</sub> at different hydrothermal treatment times. The y-axis was vertically shifted for 75, 50 and 25 m<sup>2</sup>/g for 1, 3 and 5 days, respectively, for clarity.

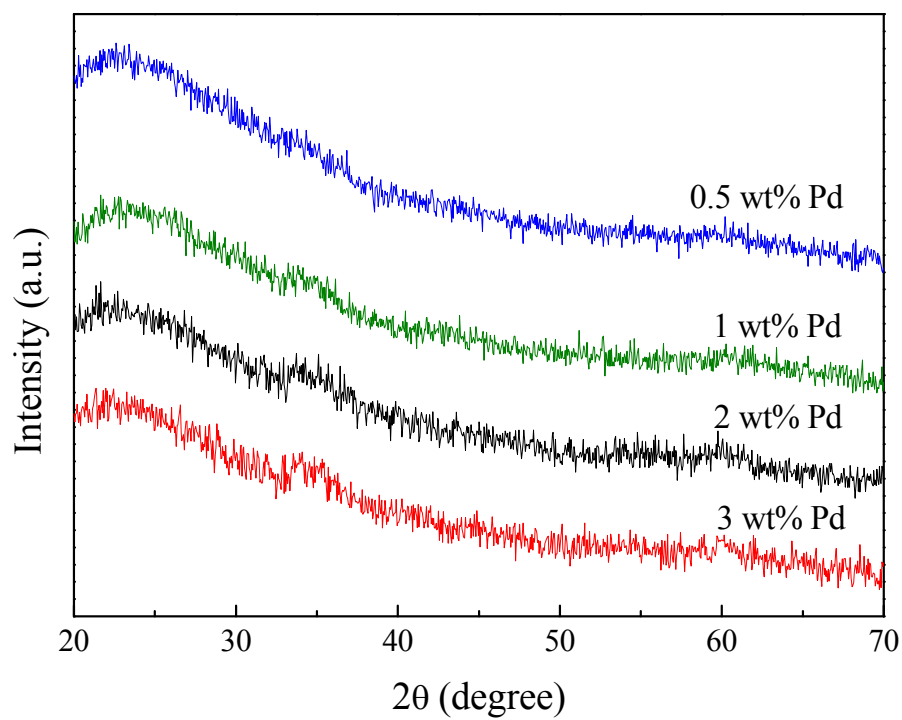

**Fig. S3.** The XRD patterns of mesoporous Pd-Fe/SiO<sub>2</sub> microspheres. The Pd loadings were in the range 0.5–3 wt%.

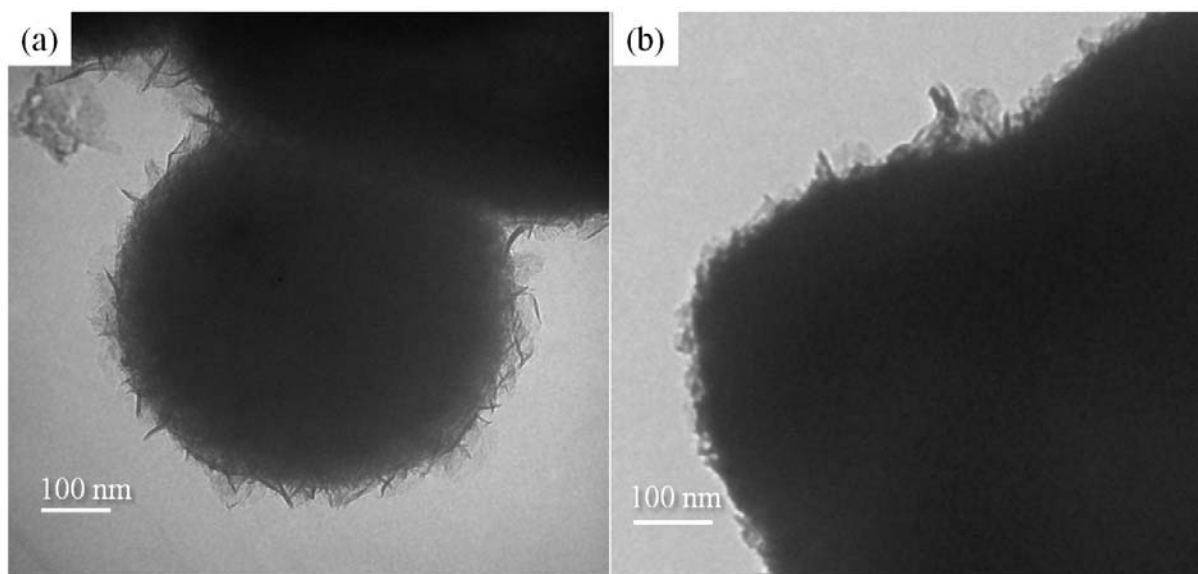

**Fig. S4.** The TEM images of Pd-Fe/SiO<sub>2</sub> microspheres after the addition of (a) 1 and (b) 3 wt% Pd ions into Fe/SiO<sub>2</sub> microsphere solutions under anoxic conditions.

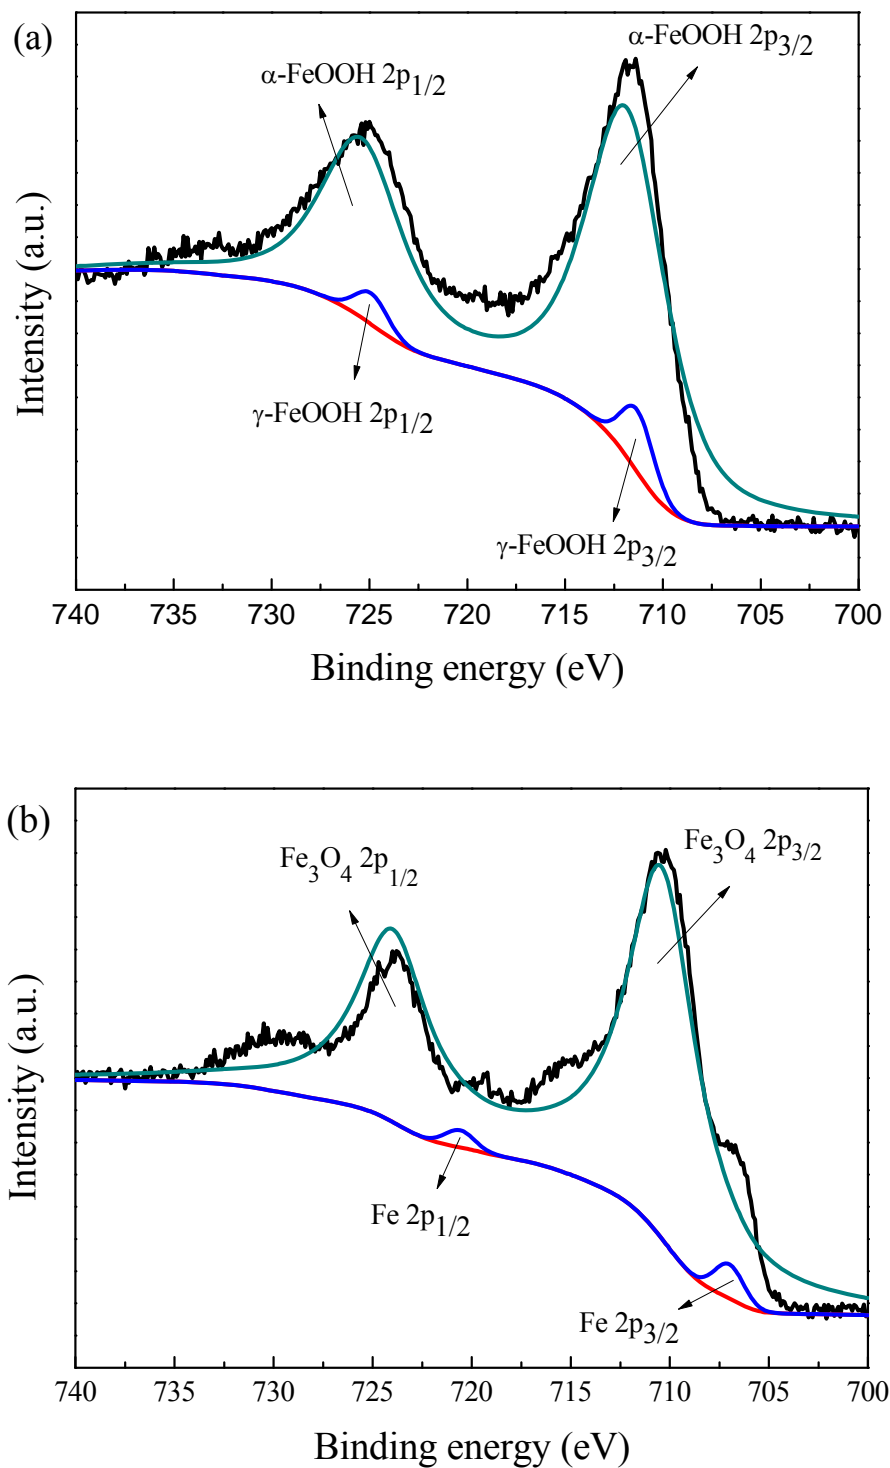

**Fig. S5.** The peak deconvolution of Fe 2p spectra of 3 wt% Pd-Fe/SiO<sub>2</sub> microspheres (a) before and (b) after Ar sputtering for 1 min.

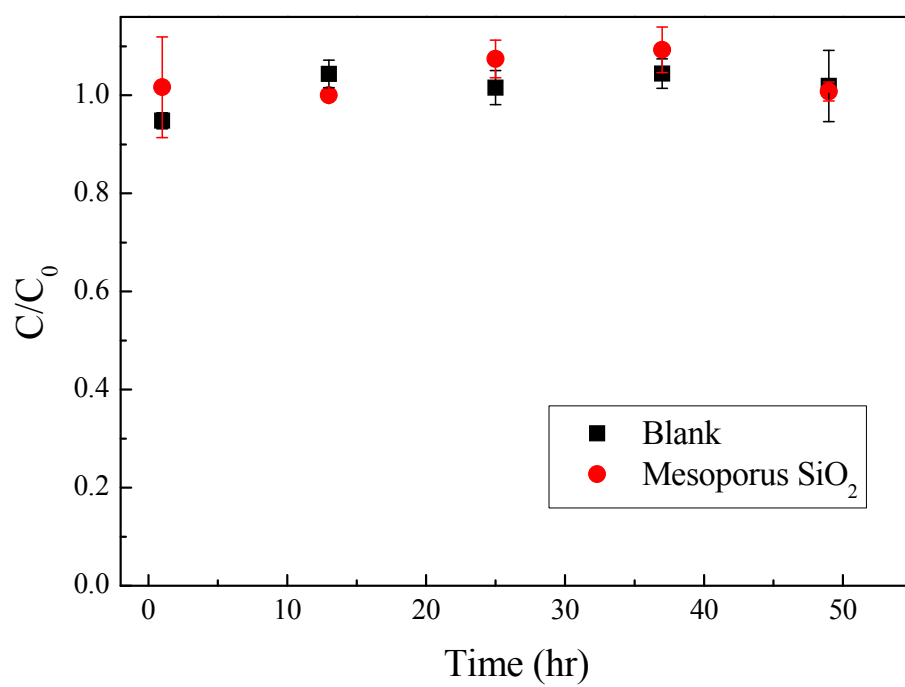

**Fig. S6.** The adsorption of 5 mg/L PCE by pure mesoporous SiO<sub>2</sub> microspheres under anoxic conditions.

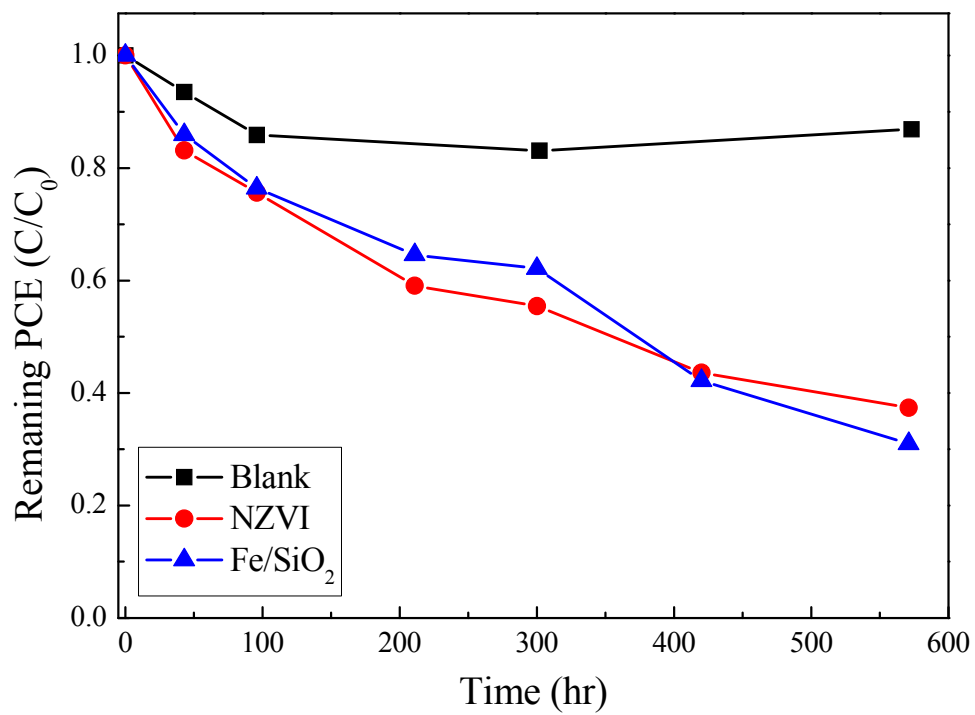

**Fig. S7.** Dechlorination of PCE by 2 g/L NZVI and mesoporous Fe/SiO<sub>2</sub> at pH 5.5 under anoxic conditions.

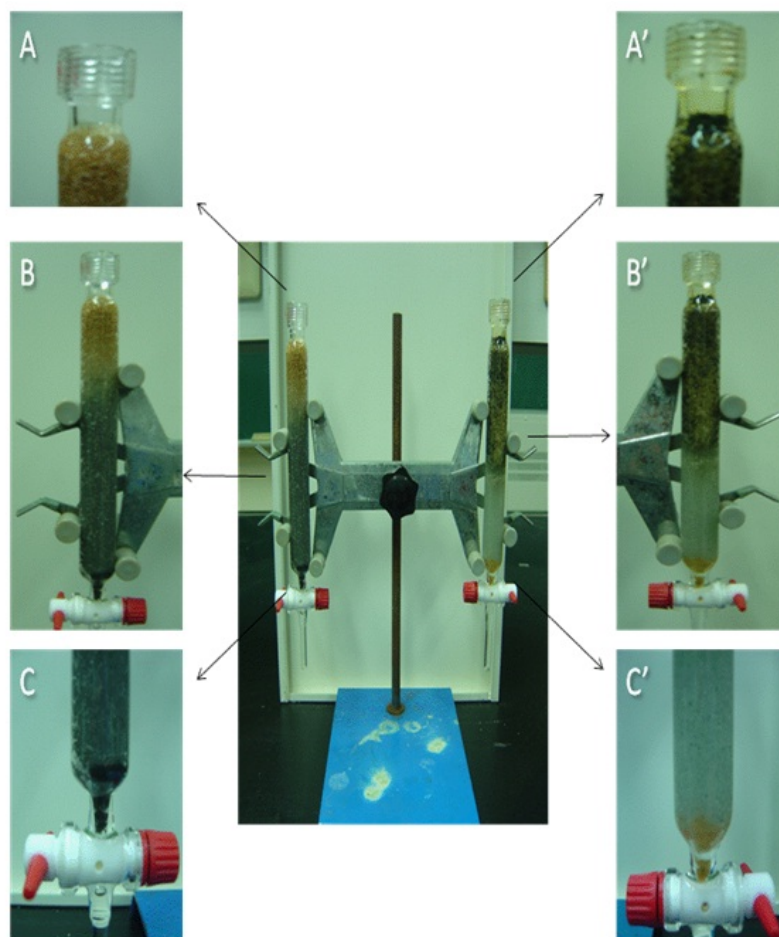

**Fig. S8.** Column experiments of the mobility and water permeability of NZVI and mesoporous Pd-Fe/SiO<sub>2</sub> microspheres. The materials in left and right columns were Pd-Fe/SiO<sub>2</sub> and pure NZVI, respectively. Panels (A), (B) and (C) indicate the accumulation of iron-based nanocomposites on the top, in the middle and on the bottom of the glass beads columns, respectively.
